# Supplementary material
Source: MDPI journal article supplement (https://www.mdpi.com/2073-4441/15/20/3702)
Supplement: s1 [file s1]

## Supporting Information

To demonstrate the surface charge of the  $\text{Cr}_2\text{O}_3/\text{ZrO}_2$  nanocomposite, the zeta potential at various pH is measured to elucidate the isoelectric point of the photocatalyst, as shown in **Figure S1**, with an isoelectric point at pH 6.22. The enhanced photocatalytic degradation of TCL at pH 5.0 is attributed to the strong electrostatic interaction of the positively charged surface of the  $\text{Cr}_2\text{O}_3/\text{ZrO}_2$  photocatalyst, with the anionic tetracycline drug molecule. Beyond the isoelectric point ( $> 6.22$ ) the decline in photocatalytic drug degradation efficiency is attributed to the electrostatic repulsive between the negatively charged photocatalyst surface and the anionic tetracycline drug molecules.

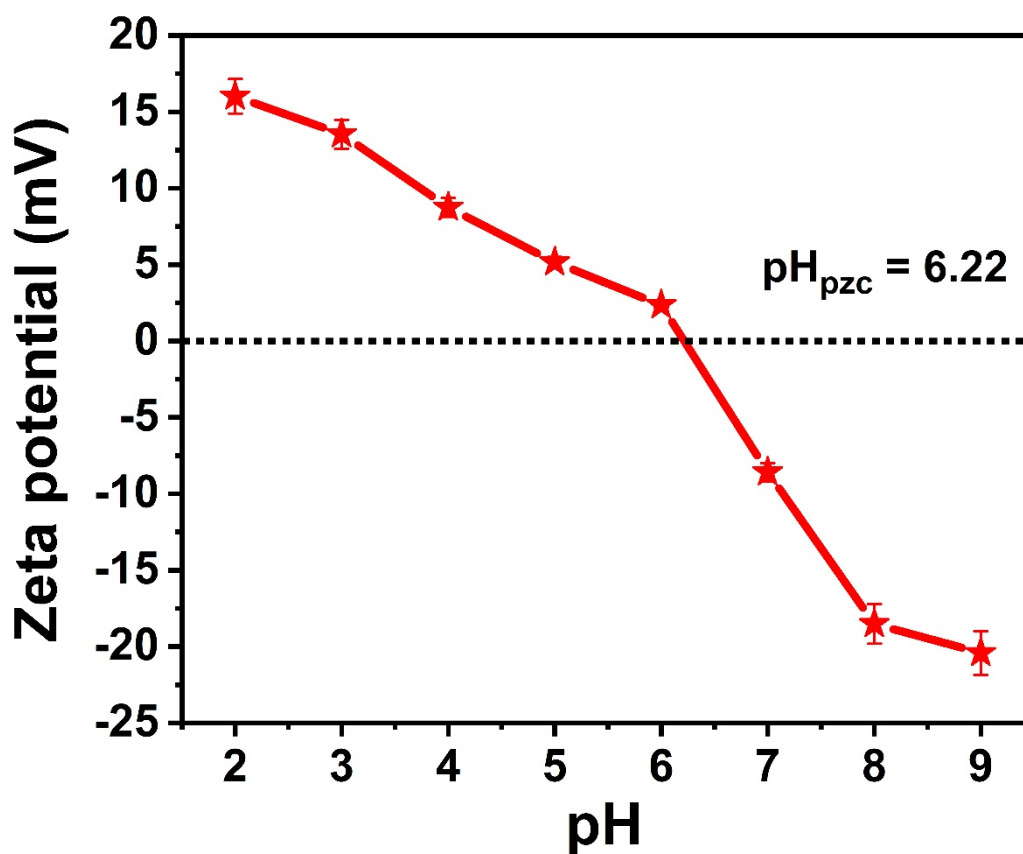

**Figure S1.** Zeta potential vs pH for  $\text{Cr}_2\text{O}_3\text{-ZrO}_2$  nanocomposite

## Radical quantification

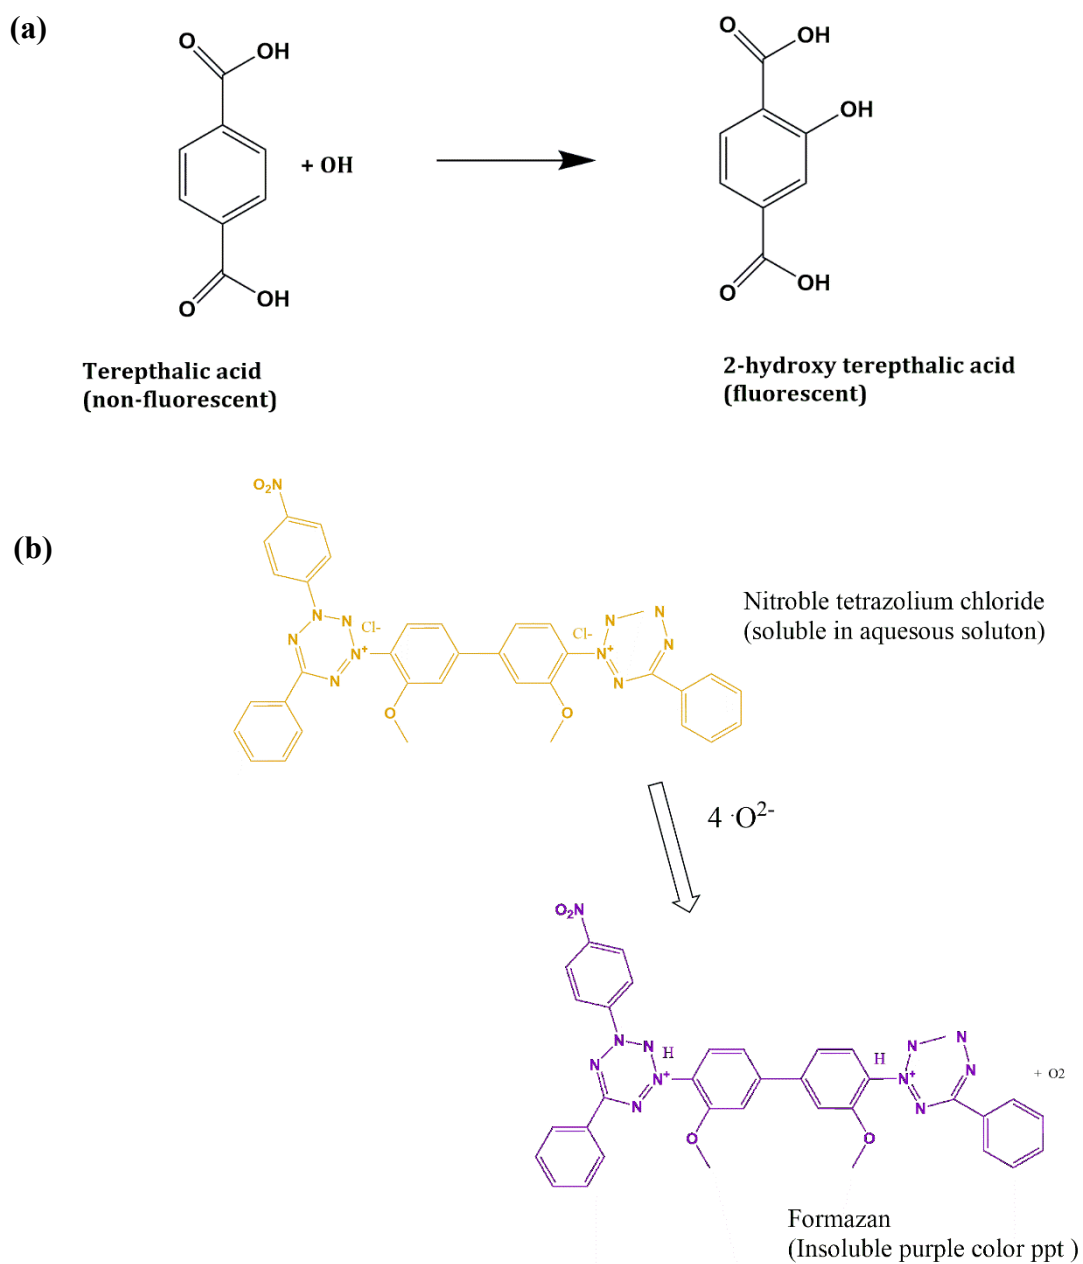

**Figure S2** (a) Reaction pathway between terephthalic acid and hydroxyl radical with the formation of fluorescent 2-hydroxy terephthalic acid (b) Reaction pathway between NBT and superoxide radicals with the formation of formazan
